# Supplementary material for: Protic Ionic Liquids for Lignin Extraction—A Lignin Characterization Study
Source: MDPI journal article supplement (doi:10.3390/ijms19020428), 2018-01-31
Supplement: s1 [file s1]

# Supplementary Information

## Protic Ionic Liquids for Lignin Extraction—A Lignin Characterization Study

Ezinne C. Achinivu \*

Ionic Liquids & Electrolytes for Energy Technologies (ILEET) Laboratory, Department of Chemical & Biomolecular Engineering, North Carolina State University, Raleigh, NC 27695, United States; eachini@ncsu.edu

\* Correspondence: eachini@ncsu.edu

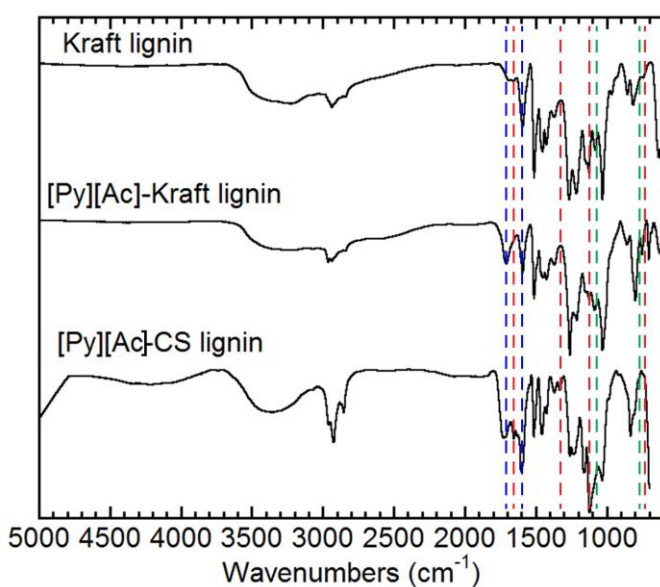

**Figure S1.** FT-IR spectra for Kraft lignin recovered from PIL dissolution and the lignin extracted from CS using the [Pyrr][Ac] PIL

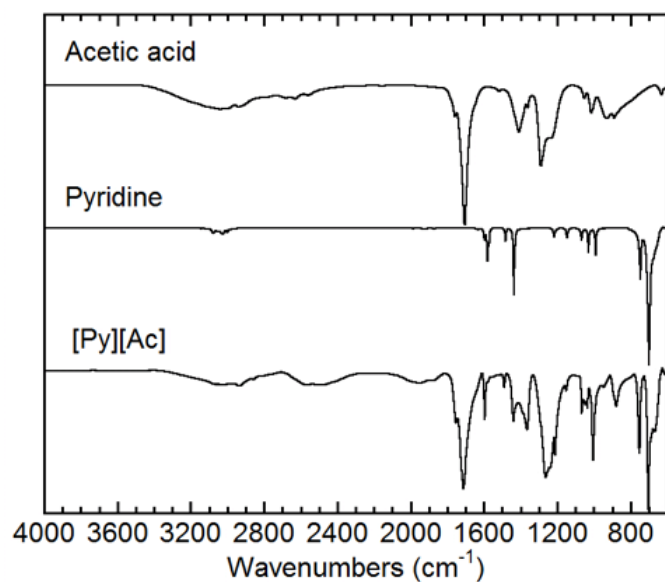

**Figure S2.** FT-IR spectra for the [Py][Ac] PIL and the reagents used to synthesize it (pyridine and acetic acid).

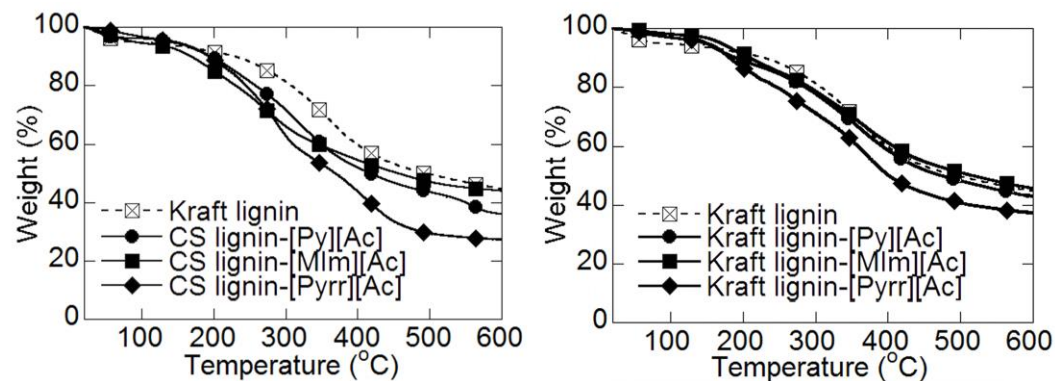

**Figure S3.** (left) Variable-temperature TGA heating traces of Kraft lignin and the recovered lignin from CS after PIL treatment, and (right) Variable-temperature TGA heating traces of original (Kraft lignin) and recovered lignin from PIL dissolution. (Reproduced from previous publication) [1].

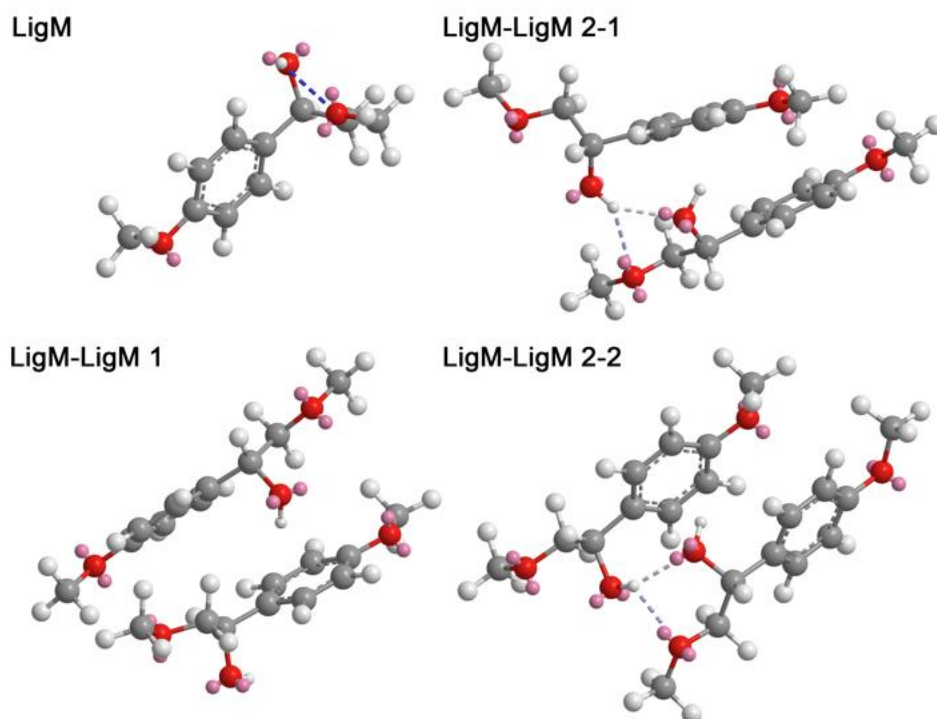

**Figure S4.** Energy minimization of the lignin model compound (LigM), LigM-LigM.

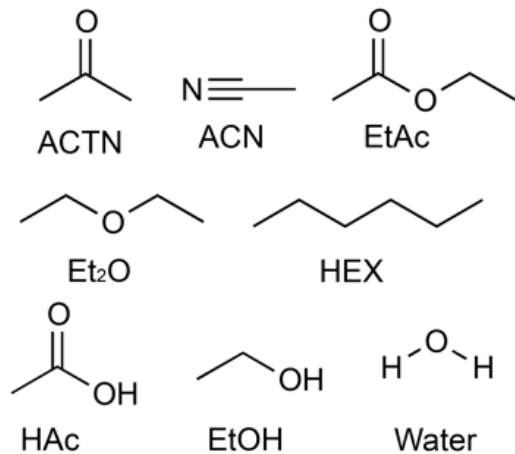

**Figure S5.** Solvents used for lignin dissolution and regeneration study.

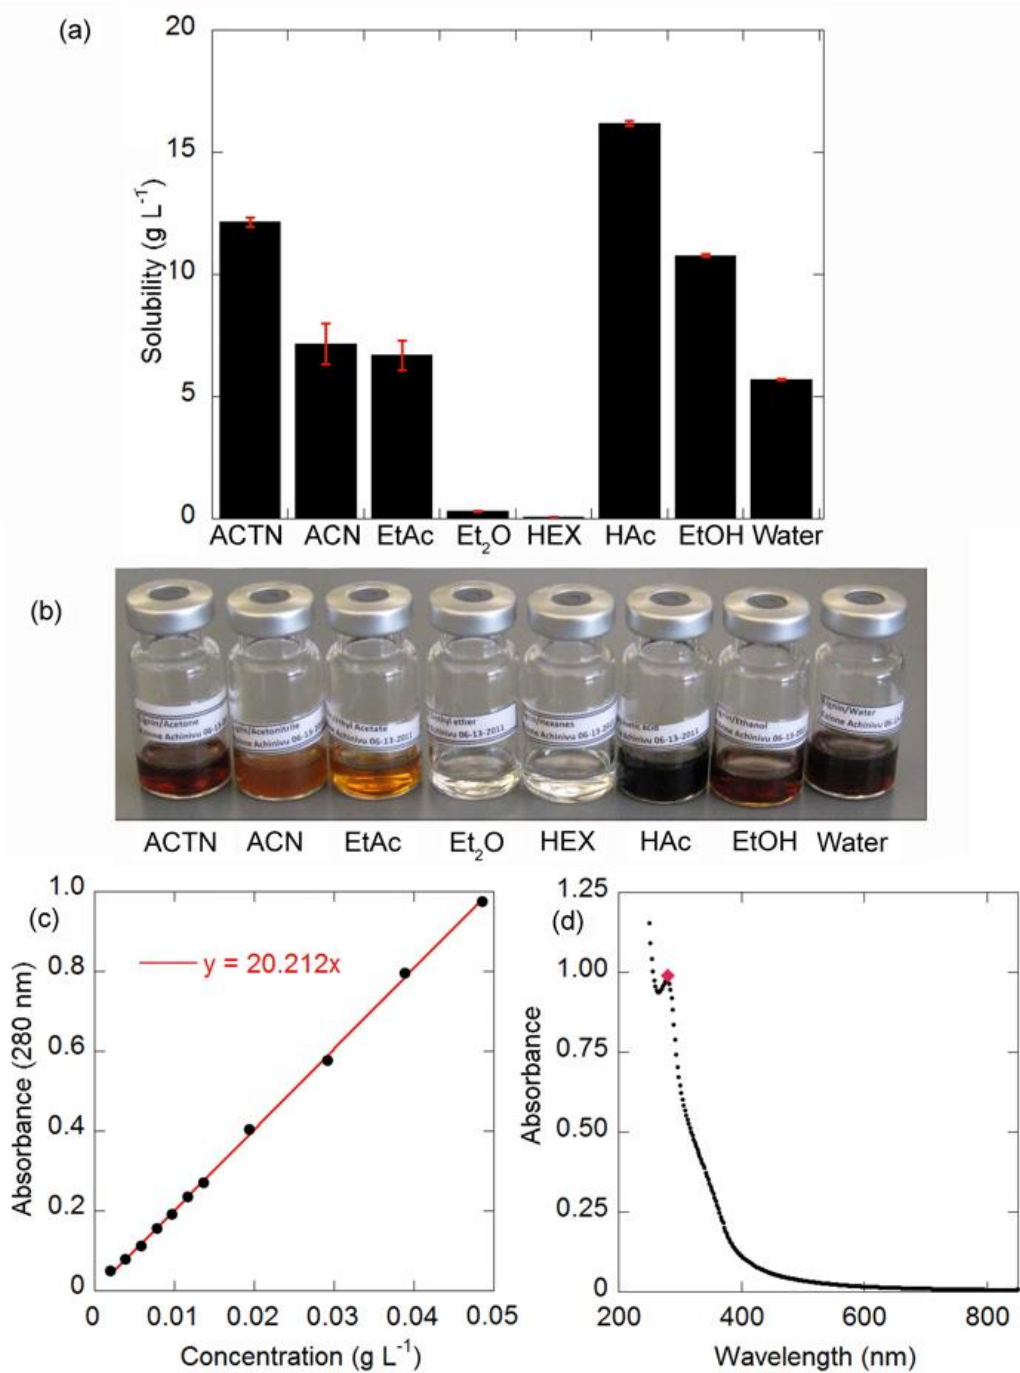

**Figure S6.** (a) The solubility of lignin in some common solvents after (b) stirring for 24 h at 90 °C, recovering the supernatant, solvent evaporation, and re-dissolution in 0.1M NaOH as determined by: (c) the Kraft lignin calibration curve at (d) the wavelength of maximum absorbance.

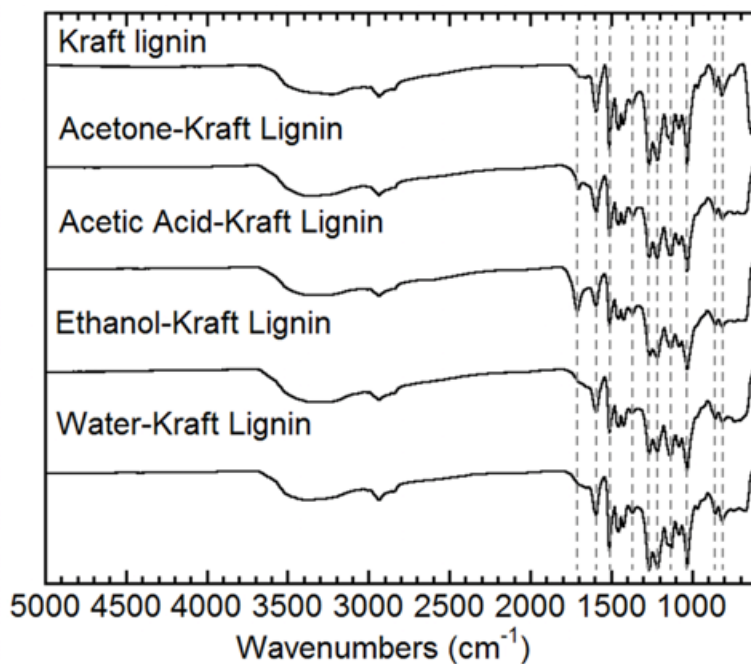

**Figure S7.** FTIR spectra of lignin regenerated from solvent dissolution after heating at 90 °C and 24 h.

**Reference:**

1. Achinivu, E. C.; Howard, R. M.; Li, G.; Gracz, H.; Henderson, W. A. Lignin extraction from biomass with protic ionic liquids. *Green Chem.* 2014, 16, 1114–1119, doi:10.1039/C3GC42306A.
